# Supplementary material for: Effects of an alkali-acid purification process on the characteristics of eucalyptus lignin fractionated from a MIBK-based organosolv process
Source: Royal Society of Chemistry journal article supplement (doi:10.1039/c6ra20081h), 2016-01-01
Supplement: c6ra20081h1.pdf [file c6ra20081h1.pdf]

## Supplementary Figures

Supplementary Figure 1. XPS survey scan spectra of (a) OL and (b) TOL

Supplementary Figure 2. XPS high resolution spectra of (a) OL and (b) TOL C1s

Supplementary Figure 3. XPS high resolution spectra of (a) OL and (b) TOL O1s

Supplementary Figure 4. Normalised FT-IR spectra of OL and TOL

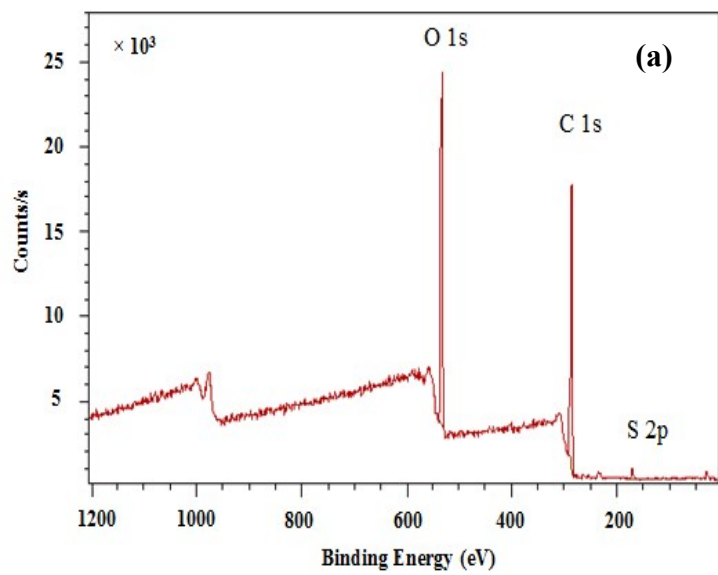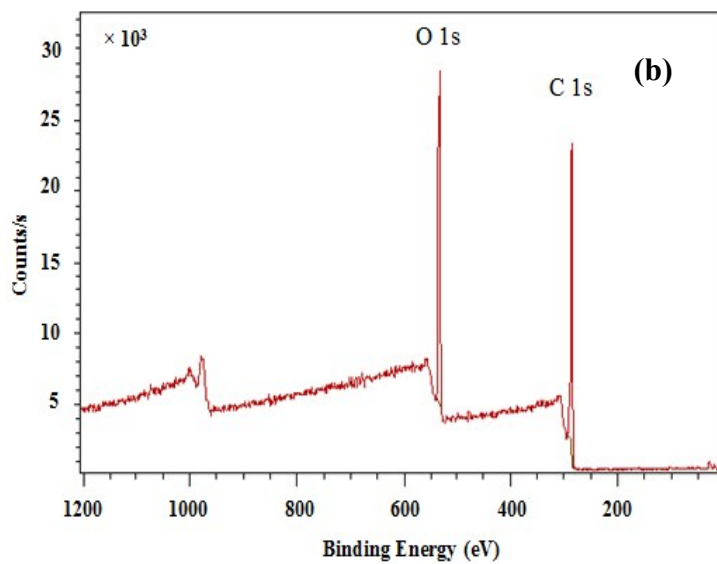

Supplementary Figure 1

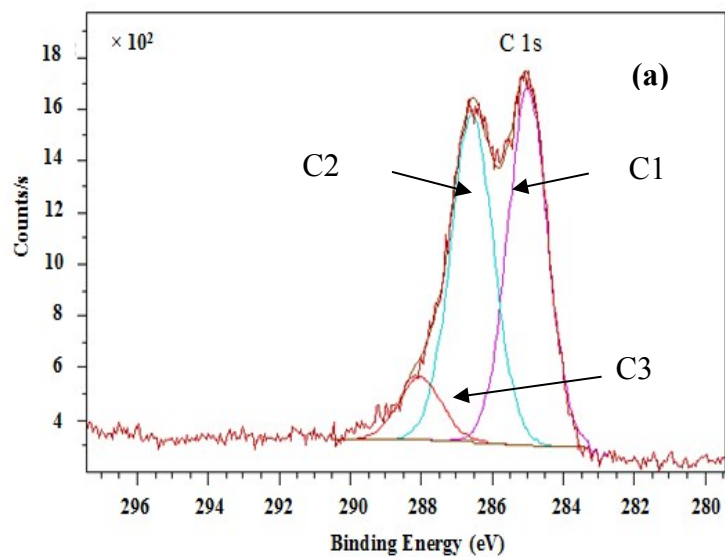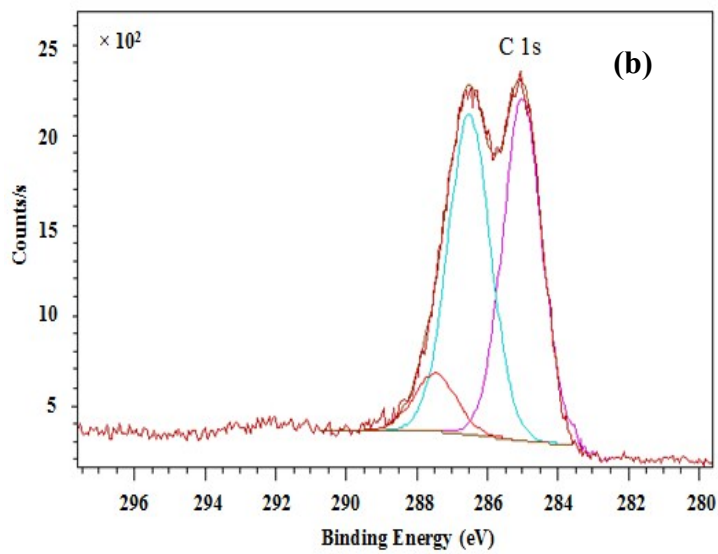

Supplementary Figure 2

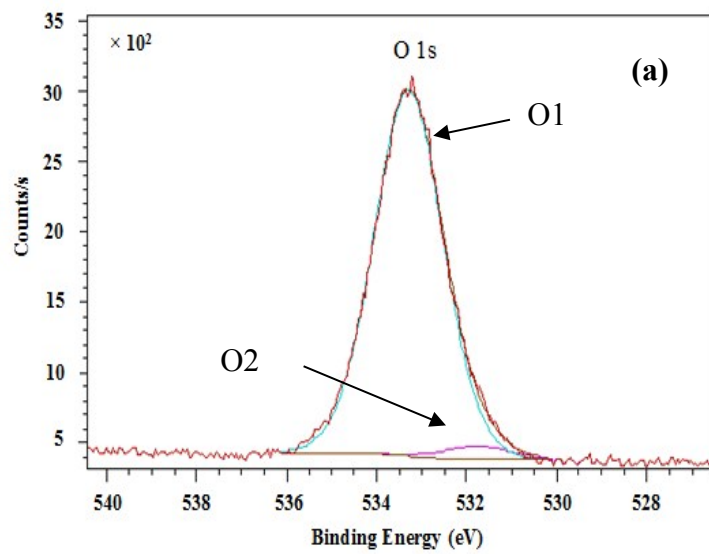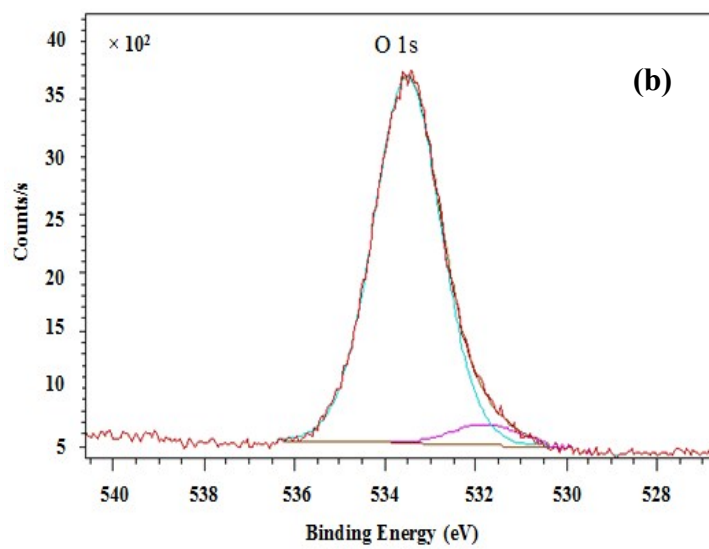

Supplementary Figure 3

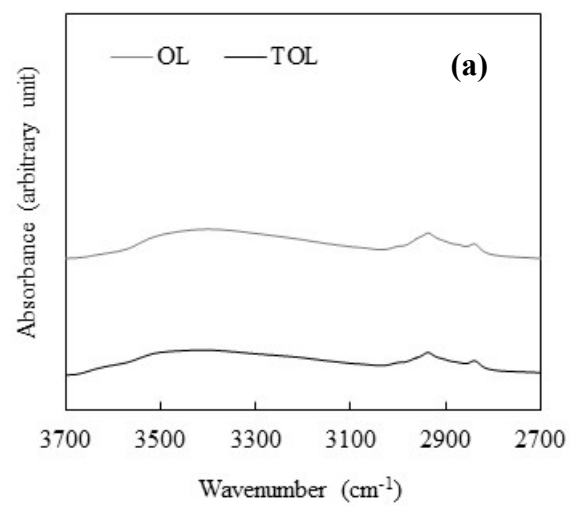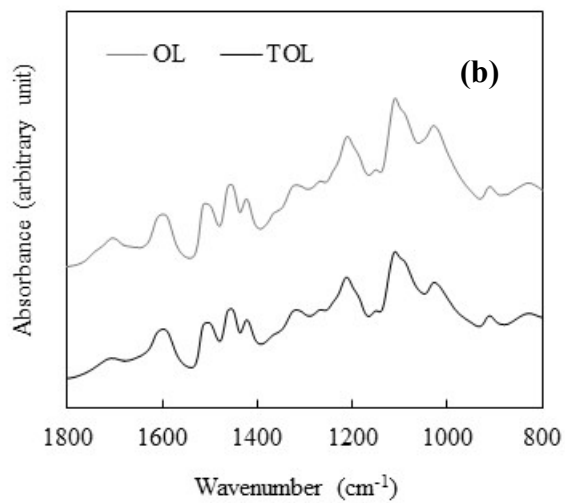

Supplementary Figure 4
